# Supplementary material for: A novel knitted scaffold made of microfiber/nanofiber core–sheath yarns for tendon tissue engineering
Source: Royal Society of Chemistry journal article supplement (doi:10.1039/d0bm00816h), 2020-01-01
Supplement: d0bm00816h1.pdf [file d0bm00816h1.pdf]

## Supporting Information

### **A novel knitted scaffold made of microfiber/nanofiber core-sheath yarns for tendon tissue engineering**

Jiangyu Cai,<sup>1#</sup> Xianrui Xie,<sup>2#</sup> Dandan Li,<sup>2</sup> Liren Wang<sup>1</sup>, Jia Jiang,<sup>1\*</sup> Xiumei Mo<sup>2\*</sup>, Jinzhong Zhao<sup>1\*</sup>

1 Department of Sports Medicine, Shanghai Jiao Tong University Affiliated Sixth People's Hospital, Shanghai, 200233, China;

2 State Key Laboratory for Modification of Chemical Fibers and Polymer Materials, College of Chemistry, Chemical Engineering and Biotechnology, Donghua University, Shanghai, 201620, China;

#These authors contributed equally to this work

\* Corresponding authors

Jia Jiang, E-mail addresses: jessicajj19@hotmail.com

Xiumei Mo, E-mail addresses: xmm@dhu.edu.cn

Jinzhong Zhao, E-mail addresses: jzzhao@sjtu.edu.cn

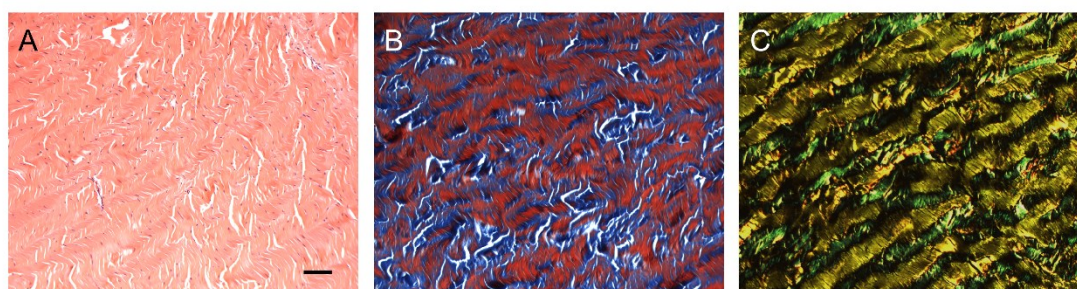

Fig.S1 H&E (A), Masson's trichrome (B) staining and Picrosirius Red staining (C) for the native patellar tendon. Bar=200  $\mu$ m.

Table.S1 Gene-specific primers for COL I, DCN, TNC and GAPDH

| Gene  | Primers                              |
|-------|--------------------------------------|
| COL I | Forward 5'-GACGCATGGCCAAGAAGACAT -3' |
|       | Reverse 5'-TCTTTGCATAGCACGCCATCG -3' |
| DCN   | Forward 5'-TGCTATTCCTCAAGGTCTGCC-3'  |
|       | Reverse 5'-ACTGCCATTTTCCACAACGGT-3'  |
| TNC   | Forward 5'-CCACCCGCTATTACATCACCG-3'  |

---

|       |                                       |
|-------|---------------------------------------|
|       | Reverse 5'-CCTGGGATGTCCACAACCTCTGA-3' |
| GAPDH | Forward 5'- CTGGAGAAACCTGCCAAGTATG-3' |
|       | Reverse 5'- GGTGGAAGAATGGGAGTTGCT-3'  |

---
